# Supplementary material for: Graphite-like carbon-encapsulated iron nanoparticle self-assembly into macroscopic microtube structures
Source: Royal Society of Chemistry journal article supplement (doi:10.1039/b710799d), 2007-01-01
Supplement: b710799d.pdf [file b710799d.pdf]

## Supporting Information

# Graphite-like carbon-encapsulated iron nanoparticle self-assembly into macroscopic microtube structures

Zhenyu Liu<sup>†‡</sup>, Lijie Ci<sup>†</sup>, N. Y. Jin-Phillipp<sup>†</sup>, M. Rühle<sup>†</sup>

<sup>†</sup> *Max-Planck-Institut für Metallforschung, Heisenbergstra. 3 D-70569, Stuttgart, Germany*

<sup>‡</sup> *State Key Laboratory of Coal Conversion, Institute of Coal Chemistry, P. O. Box, 165, Taiyuan, Shanxi 030001, P. R. China*

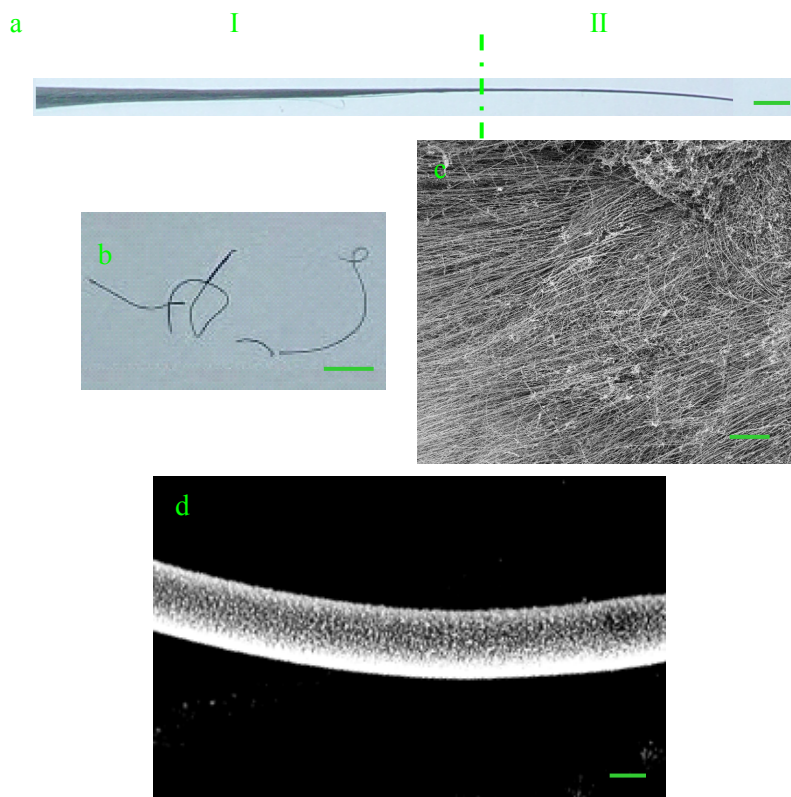

**Fig. S1.** a) Macroscopic morphology of vapor grown carbon fibers and carbon-encapsulated iron nanoparticle microtube superstructure (Scale bar: 1 cm). b) Optical images of the graphite-like carbon-encapsulated iron nanoparticle microtubes, the formed millimeter-scale circle shows good flexibility (Scale bar: 500  $\mu\text{m}$ ). (c) Low magnification SEM image for vapor grown carbon fibers. (Scale bar: 150  $\mu\text{m}$ ) d) Graphite-like carbon-encapsulated iron nanoparticles self-assembled tubular superstructure. (Scale bar: 50  $\mu\text{m}$ )

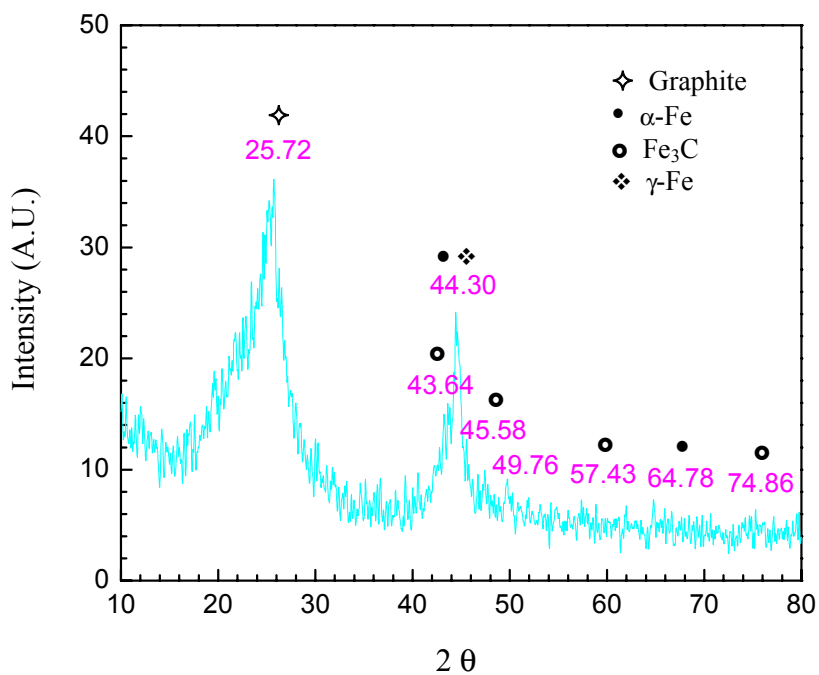

**Fig. S2.** X-ray diffraction pattern of the graphite-like carbon-encapsulated iron nanoparticle microtubes (Cu K $\alpha$  radiation,  $\lambda=0.1542$  nm).

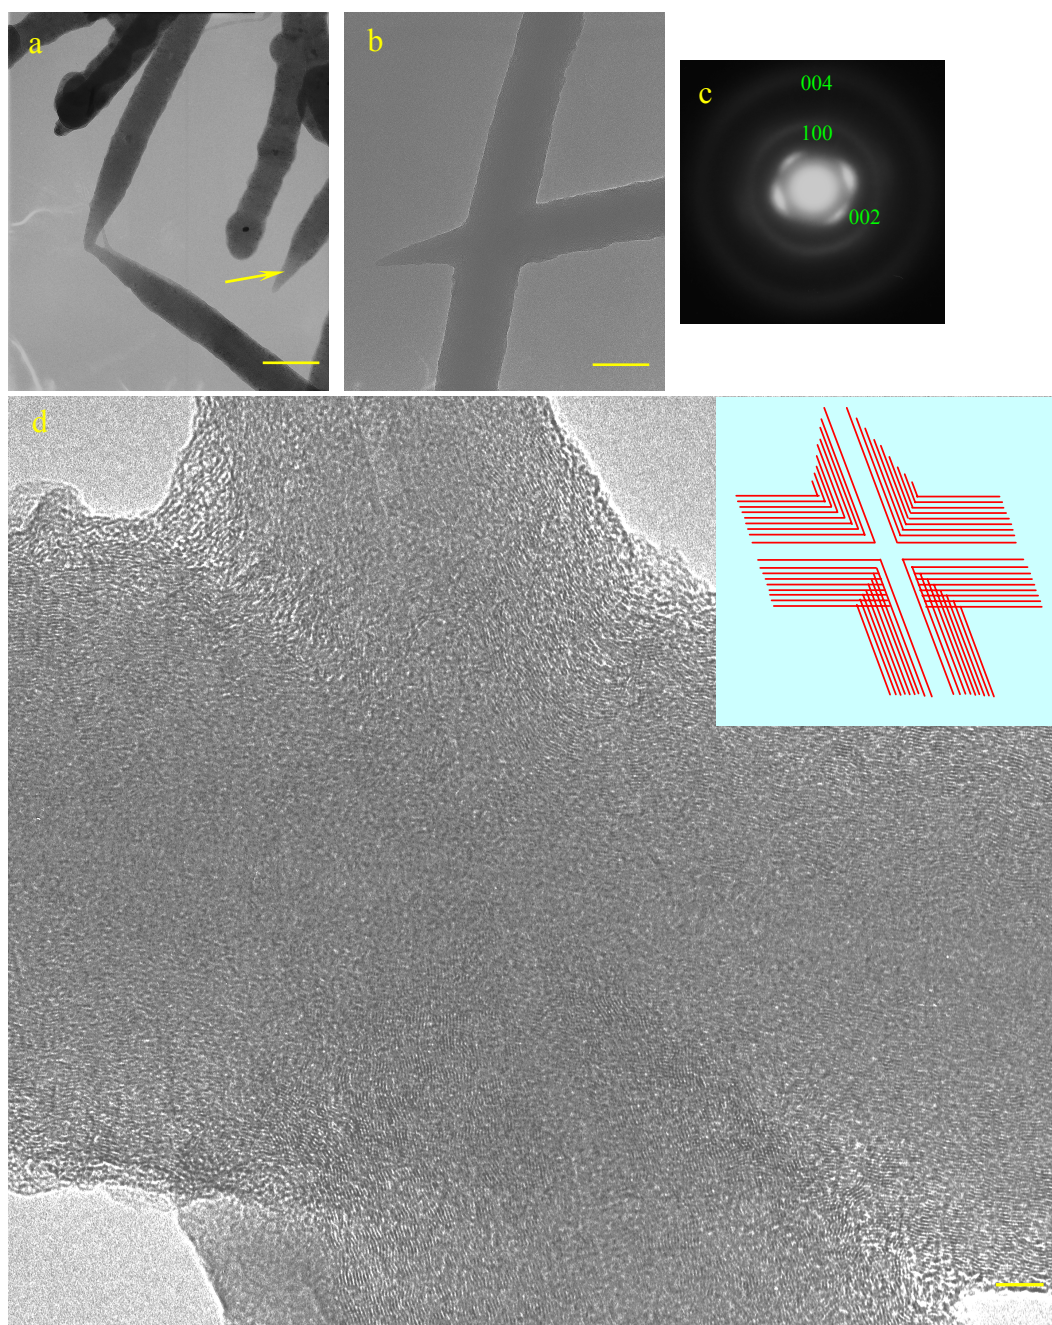

**Fig. S3.** a) TEM image for a carbon nanotube intermolecular junction formed by two carbon nanotubes, which grow to meet each other. Arrow indicates another similar CNT with conical tip. (Scale bar: 100 nm). b) TEM image for a carbon nanotube cross junction. (Scale bar: 60 nm) c) SAED pattern of the cross junction. d) HRTEM of the carbon nanotube cross junction, showing clearly steady connection and microstructure of nearly ideal hollow connected part after restructuring. (Scale bar: 5 nm) The inset shows the structural model of the cross junction.
